# Supplementary material
Source: Research Square preprint supplement (doi:10.21203/rs.3.rs-9252005/v1)
Supplement: Supplementary file 1 [file d3ea6405ac9f617a78d2a59d.pdf]

## Limited impact of presaturation time on the accuracy of $^1\text{H}$ qNMR using a NOESY with high-power presaturation

Naoki Saito<sup>\*,†</sup>

<sup>†</sup>Center for Environmental Standards and Measurement, Health and Environmental Risk Division, National Institute for Environmental Studies, 16-2 Onogawa, Tsukuba, Ibaraki 305-8506, Japan

\*Corresponding Author E-mail: saito-naoki@nies.go.jp

---

### Table of contents

**Fig. SI1:** Total uncertainty budgets for prepared concentrations of sample solutions.

**Fig. SI2:** Full version of Fig. 7.

**Fig. SI3:** Full version of Fig. 8.

**Table SI1:** Presaturation strengths for a  $\text{H}_2\text{O}/\text{D}_2\text{O}$  (90/10 vol %) solution containing Gly, MA and  $\text{DSS-}d_6$ .

**Table SI2:** Presaturation strengths for a  $\text{H}_2\text{O}/\text{D}_2\text{O}$  (90/10 vol %) solution containing Phe, Val, MA and  $\text{DSS-}d_6$ .

**Table SI3:** Unconverted concentration data corresponding to Figs. 3e and 3f.

**Table SI4:** Unconverted concentration data corresponding to Fig. 5.

**Table SI5:** Unconverted concentration data corresponding to Fig. SI2.

**Table SI6:** Unconverted concentration data corresponding to Fig. SI3.

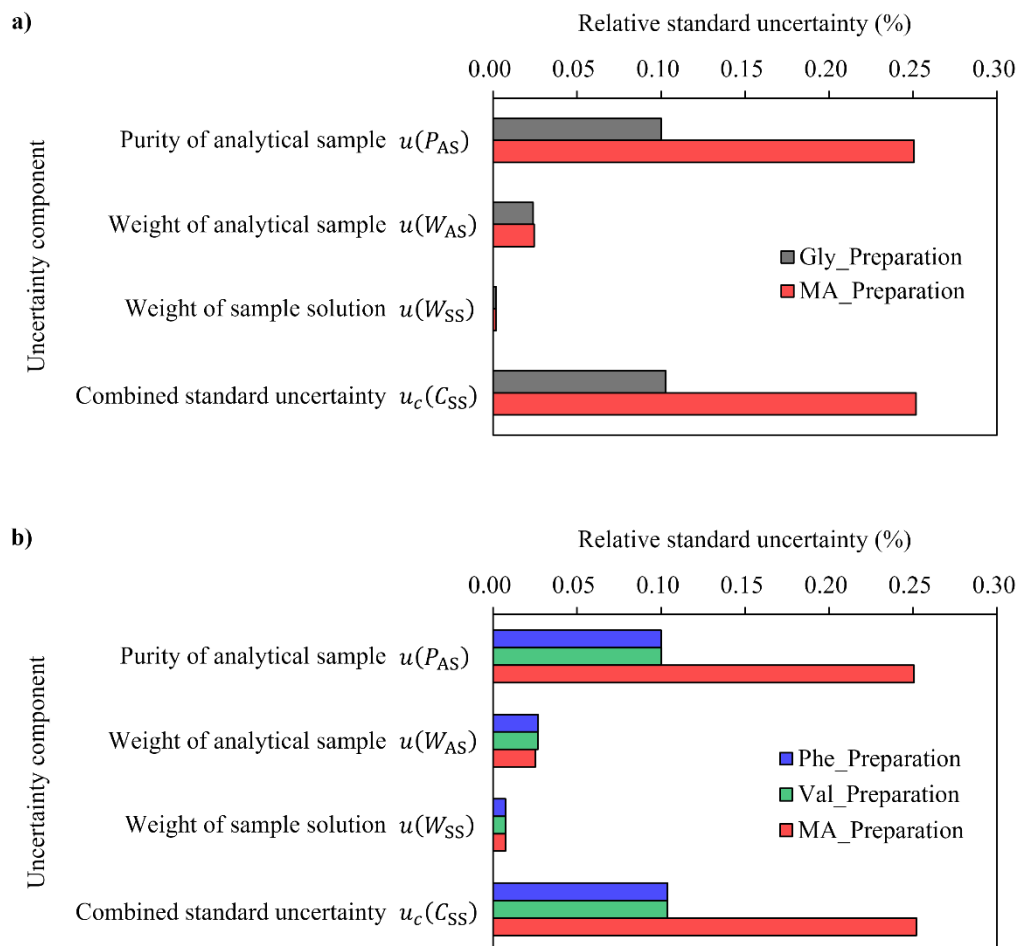

**Fig. S11** Total uncertainty budgets for prepared concentrations of sample solutions. a) A H<sub>2</sub>O/D<sub>2</sub>O (90/10 vol %) solution containing Gly, MA and DSS-*d*<sub>6</sub>, b) another H<sub>2</sub>O/D<sub>2</sub>O (90/10 vol %) solution containing Phe, Val, MA and DSS-*d*<sub>6</sub>. The prepared concentrations of the solutions were calculated by equation S1.

$$C_{SS} = (W_{AS}/W_{SS}) \cdot P_{AS} \cdot 10^6 \quad (S1)$$

Here,  $C$  is concentration (mg kg<sup>-1</sup>),  $W$  is weight (mg) and  $P$  is purity (kg kg<sup>-1</sup>). Subscripts SS and AS refer to sample solution and analytical sample, respectively. Combined standard uncertainties of the prepared concentrations of the sample solutions were evaluated using each component uncertainty in equation S1.

Supplementary Information

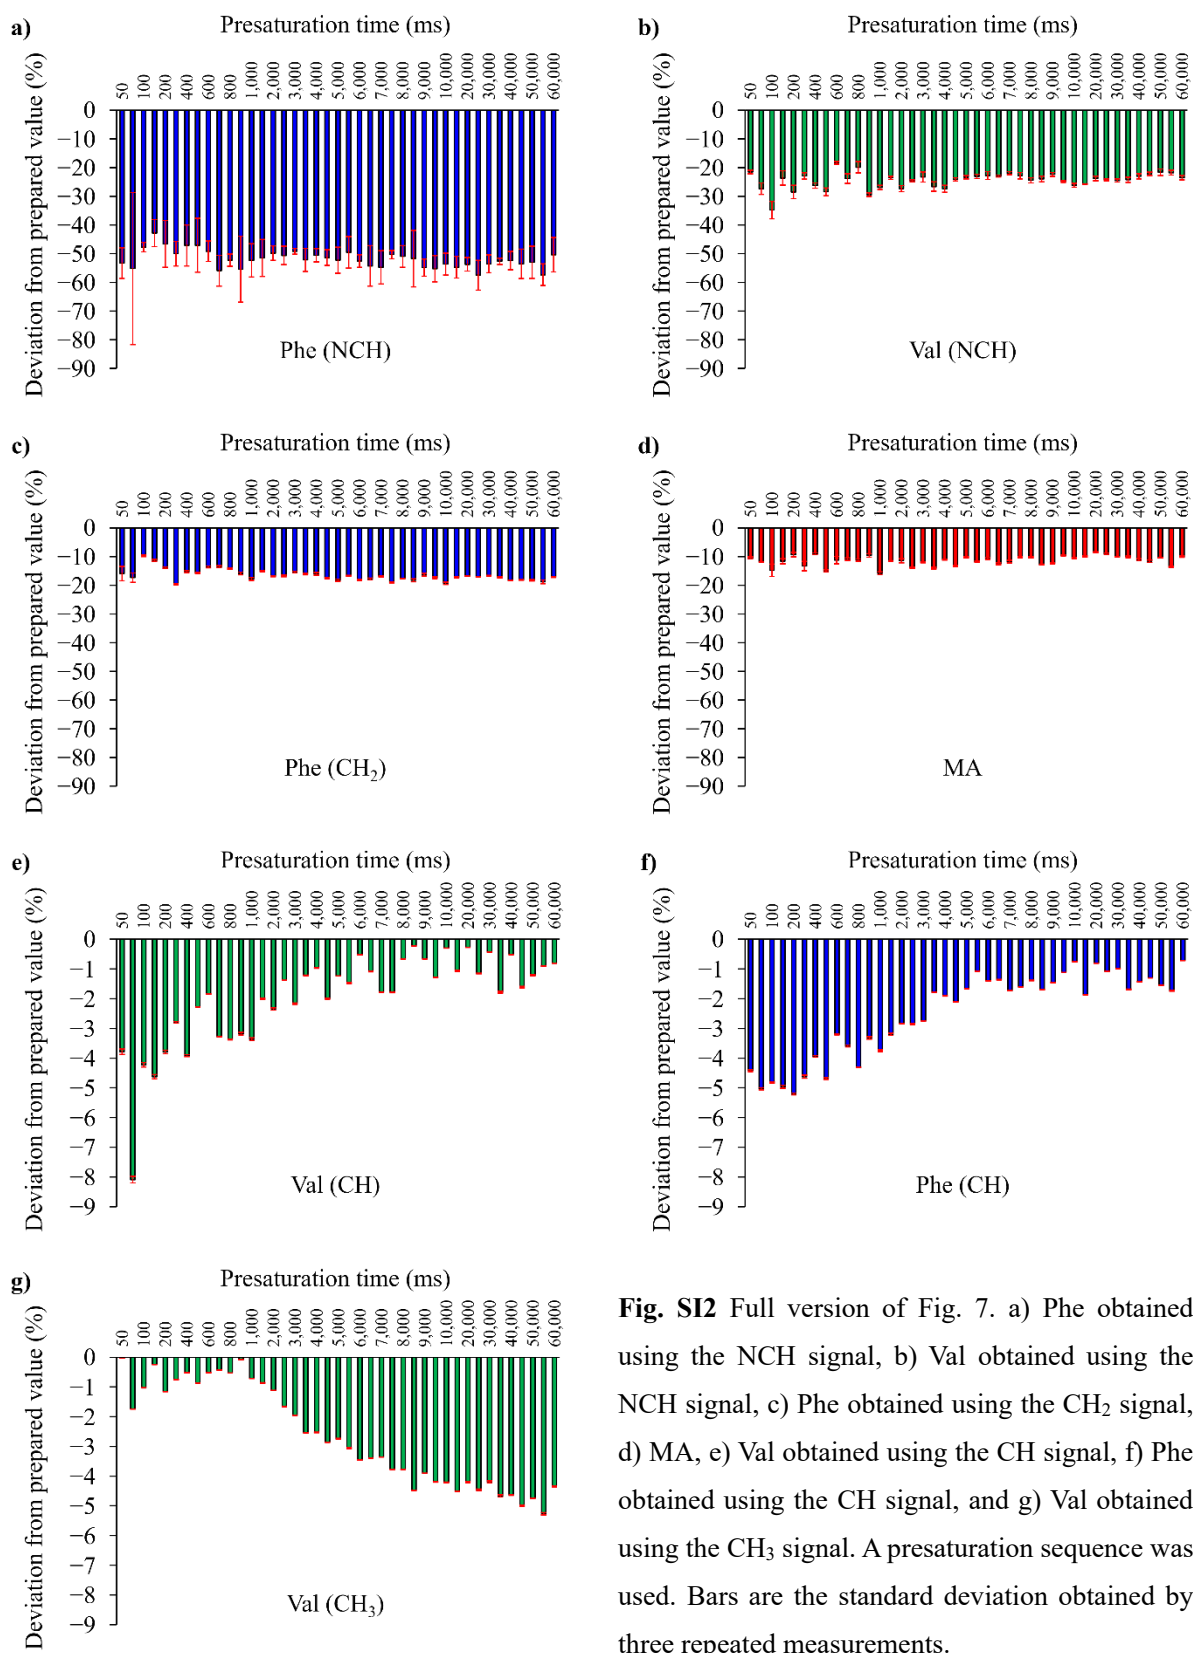

**Fig. SI2** Full version of Fig. 7. a) Phe obtained using the NCH signal, b) Val obtained using the NCH signal, c) Phe obtained using the CH<sub>2</sub> signal, d) MA, e) Val obtained using the CH signal, f) Phe obtained using the CH signal, and g) Val obtained using the CH<sub>3</sub> signal. A presaturation sequence was used. Bars are the standard deviation obtained by three repeated measurements.

Supplementary Information

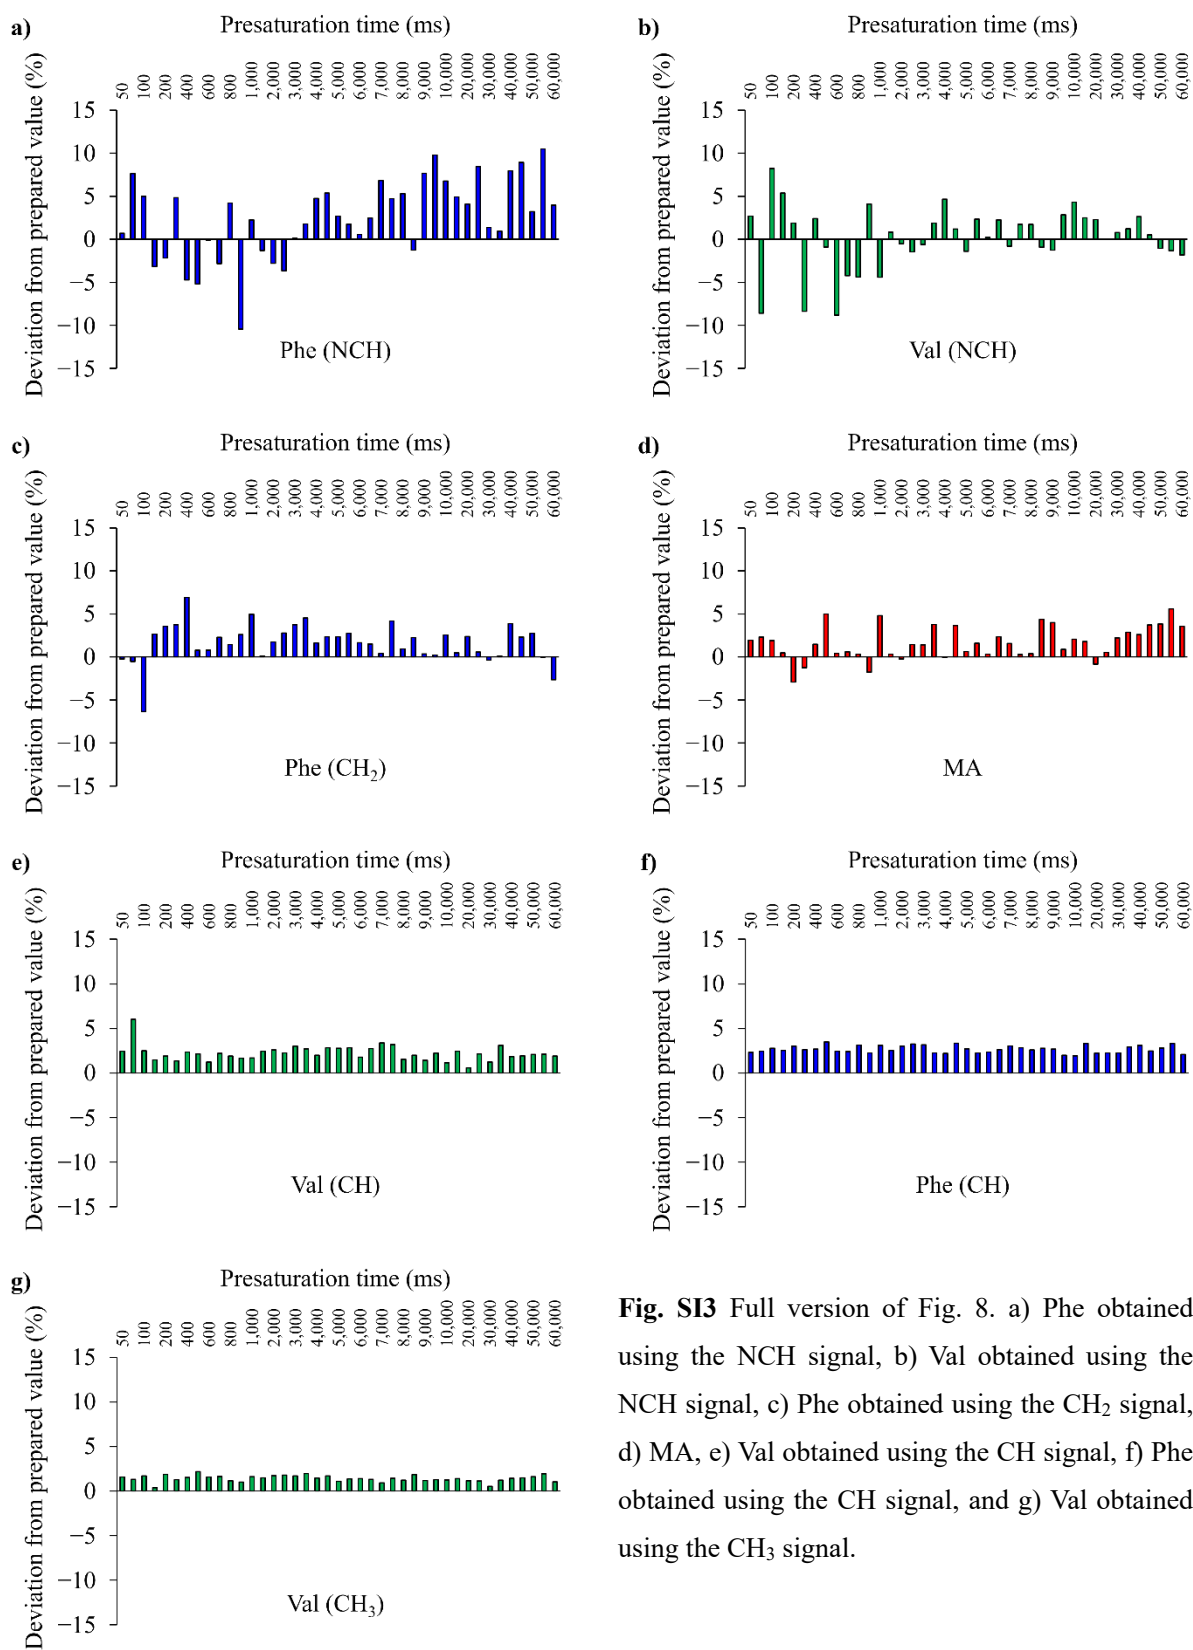

**Fig. SI3** Full version of Fig. 8. a) Phe obtained using the NCH signal, b) Val obtained using the NCH signal, c) Phe obtained using the CH<sub>2</sub> signal, d) MA, e) Val obtained using the CH signal, f) Phe obtained using the CH signal, and g) Val obtained using the CH<sub>3</sub> signal.

*Supplementary Information*

**Table SII** Presaturation strengths for a H<sub>2</sub>O/D<sub>2</sub>O (90/10 vol %) solution containing Gly, MA and DSS-*d*<sub>6</sub>.

| Attenuation<br>(dB) | 90 degree pulse width <sup>[a]</sup><br>( $\mu$ s) | Presaturation strength <sup>[b]</sup><br>( $\gamma B_1/2\pi$ , Hz) |
|---------------------|----------------------------------------------------|--------------------------------------------------------------------|
| 112                 | 2793,419.0                                         | 0.1                                                                |
| 106                 | 1400,026.0                                         | 0.2                                                                |
| 100                 | 701,675.1                                          | 0.4                                                                |
| 94                  | 351,670.6                                          | 0.7                                                                |
| 88                  | 176,252.8                                          | 1.4                                                                |
| 82                  | 88,335.7                                           | 2.8                                                                |
| 76                  | 44,272.7                                           | 5.6                                                                |
| 70                  | 22,188.9                                           | 11.3                                                               |
| 64                  | 11,120.8                                           | 22.5                                                               |
| 58                  | 5,573.6                                            | 44.9                                                               |
| 55                  | 3,945.8                                            | 63.4                                                               |
| 52                  | 2,793.4                                            | 89.5                                                               |
| 46                  | 1,400.0                                            | 178.6                                                              |
| 40                  | 701.7                                              | 356.3                                                              |
| 34                  | 351.7                                              | 710.9                                                              |
| 28                  | 176.3                                              | 1,418.4                                                            |
| 22                  | 88.3                                               | 2,830.1                                                            |

[a] The values were calculated using an attenuation of 5.9 dB and a pulse width of 13.84  $\mu$ s for a 90 degree pulse.

[b] The values were calculated by reciprocals of 360 degree pulse widths.

*Supplementary Information*

**Table S12** Presaturation strengths for a H<sub>2</sub>O/D<sub>2</sub>O (90/10 vol %) solution containing Phe, Val, MA and DSS-*d*<sub>6</sub>.

| Attenuation<br>(dB) | 90 degree pulse width <sup>[a]</sup><br>( $\mu$ s) | Presaturation strength <sup>[b]</sup><br>( $\gamma B_1/2\pi$ , Hz) |
|---------------------|----------------------------------------------------|--------------------------------------------------------------------|
| 112                 | 2688,464.0                                         | 0.1                                                                |
| 106                 | 1347,423.8                                         | 0.2                                                                |
| 100                 | 675,311.6                                          | 0.4                                                                |
| 94                  | 338,457.6                                          | 0.7                                                                |
| 88                  | 169,630.6                                          | 1.5                                                                |
| 82                  | 85,016.7                                           | 2.9                                                                |
| 76                  | 42,609.3                                           | 5.9                                                                |
| 70                  | 21,355.2                                           | 11.7                                                               |
| 64                  | 10,703.0                                           | 23.4                                                               |
| 58                  | 5,364.2                                            | 46.6                                                               |
| 55                  | 3,797.6                                            | 65.8                                                               |
| 52                  | 2,688.5                                            | 93.0                                                               |
| 46                  | 1,347.4                                            | 185.5                                                              |
| 40                  | 675.3                                              | 370.2                                                              |
| 34                  | 338.5                                              | 738.6                                                              |
| 28                  | 169.6                                              | 1,473.8                                                            |
| 22                  | 85.0                                               | 2,940.6                                                            |

[a] The values were calculated using an attenuation of 5.9 dB and a pulse width of 13.32  $\mu$ s for a 90 degree pulse.

[b] The values were calculated by reciprocals of 360 degree pulse widths.

*Supplementary Information*

**Table S13** Unconverted concentration data corresponding to Figs. 3e and 3f.

| Presaturation time<br>(ms) | Measured concentration <sup>[a]</sup><br>(mg kg <sup>-1</sup> ) |     |
|----------------------------|-----------------------------------------------------------------|-----|
|                            | Gly                                                             | MA  |
| 1                          | 138                                                             | 291 |
| 5                          | 210                                                             | 268 |
| 10                         | 219                                                             | 267 |
| 25                         | 226                                                             | 253 |
| 50                         | 210                                                             | 242 |
| 100                        | 217                                                             | 245 |
| 200                        | 210                                                             | 243 |
| 300                        | 218                                                             | 239 |
| 400                        | 212                                                             | 244 |
| 500                        | 204                                                             | 235 |
| 700                        | 213                                                             | 239 |
| 900                        | 210                                                             | 239 |
| 1,000                      | 210                                                             | 240 |
| 1,500                      | 206                                                             | 229 |
| 2,000                      | 205                                                             | 244 |
| 2,500                      | 223                                                             | 242 |
| 3,000                      | 217                                                             | 233 |
| 3,500                      | 219                                                             | 253 |
| 4,000                      | 220                                                             | 247 |
| 4,500                      | 218                                                             | 237 |
| 5,000                      | 214                                                             | 242 |
| 5,500                      | 225                                                             | 253 |
| 6,000                      | 217                                                             | 243 |
| 6,500                      | 216                                                             | 239 |
| 7,000                      | 219                                                             | 260 |
| 7,500                      | 225                                                             | 233 |
| 8,000                      | 224                                                             | 245 |
| 8,500                      | 214                                                             | 256 |
| 9,000                      | 223                                                             | 239 |
| 9,500                      | 219                                                             | 247 |

Supplementary Information

|        |     |     |
|--------|-----|-----|
| 10,000 | 221 | 262 |
| 15,000 | 214 | 237 |
| 20,000 | 214 | 242 |
| 25,000 | 217 | 243 |
| 30,000 | 220 | 250 |
| 35,000 | 222 | 262 |
| 40,000 | 219 | 260 |
| 45,000 | 215 | 250 |
| 50,000 | 219 | 247 |
| 55,000 | 219 | 255 |
| 60,000 | 214 | 263 |

**Table SI4** Unconverted concentration data corresponding to Fig. 5.

| Presatura-<br>tion time<br>(ms) | Measured concentration <sup>[a]</sup><br>(mg kg <sup>-1</sup> ) |       |         |       |                     |      |     |      |        |      |        |     |                     |     |
|---------------------------------|-----------------------------------------------------------------|-------|---------|-------|---------------------|------|-----|------|--------|------|--------|-----|---------------------|-----|
|                                 | Phe NCH                                                         |       | Val NCH |       | Phe CH <sub>2</sub> |      | MA  |      | Val CH |      | Phe CH |     | Val CH <sub>3</sub> |     |
| 50                              | 460                                                             | (102) | 792     | (43)  | 813                 | (27) | 943 | (45) | 962    | (19) | 950    | (8) | 991                 | (2) |
| 80                              | 509                                                             | (157) | 625     | (121) | 797                 | (58) | 932 | (42) | 955    | (13) | 946    | (3) | 971                 | (2) |
| 100                             | 556                                                             | (181) | 716     | (25)  | 814                 | (40) | 898 | (45) | 959    | (2)  | 951    | (4) | 982                 | (2) |
| 150                             | 524                                                             | (126) | 797     | (12)  | 886                 | (7)  | 916 | (25) | 945    | (4)  | 947    | (2) | 977                 | (1) |
| 200                             | 497                                                             | (122) | 716     | (37)  | 870                 | (37) | 904 | (28) | 957    | (23) | 949    | (7) | 982                 | (3) |
| 300                             | 532                                                             | (147) | 671     | (68)  | 815                 | (25) | 881 | (8)  | 961    | (10) | 951    | (1) | 981                 | (3) |
| 400                             | 467                                                             | (74)  | 743     | (18)  | 890                 | (27) | 953 | (10) | 960    | (6)  | 959    | (4) | 985                 | (1) |
| 500                             | 463                                                             | (39)  | 689     | (27)  | 826                 | (59) | 928 | (12) | 974    | (11) | 959    | (4) | 988                 | (4) |
| 600                             | 493                                                             | (66)  | 711     | (24)  | 846                 | (55) | 919 | (32) | 970    | (20) | 963    | (8) | 986                 | (8) |
| 700                             | 400                                                             | (73)  | 701     | (26)  | 861                 | (14) | 924 | (22) | 965    | (8)  | 959    | (6) | 987                 | (4) |
| 800                             | 505                                                             | (33)  | 739     | (46)  | 847                 | (41) | 918 | (31) | 961    | (4)  | 959    | (2) | 982                 | (1) |
| 900                             | 331                                                             | (20)  | 728     | (84)  | 841                 | (27) | 914 | (9)  | 961    | (2)  | 960    | (3) | 985                 | (3) |
| 1,000                           | 485                                                             | (115) | 670     | (94)  | 846                 | (35) | 917 | (23) | 959    | (6)  | 965    | (3) | 984                 | (1) |
| 1,500                           | 459                                                             | (51)  | 753     | (10)  | 824                 | (8)  | 914 | (2)  | 980    | (3)  | 964    | (0) | 981                 | (3) |

*Supplementary Information*

|        |     |       |     |      |     |      |     |      |     |      |     |     |     |     |
|--------|-----|-------|-----|------|-----|------|-----|------|-----|------|-----|-----|-----|-----|
| 2,000  | 460 | (8)   | 704 | (52) | 824 | (44) | 910 | (4)  | 978 | (7)  | 972 | (4) | 981 | (2) |
| 2,500  | 444 | (48)  | 721 | (45) | 835 | (66) | 902 | (24) | 984 | (6)  | 975 | (5) | 977 | (5) |
| 3,000  | 495 | (61)  | 743 | (24) | 857 | (21) | 921 | (21) | 984 | (3)  | 975 | (5) | 973 | (2) |
| 3,500  | 482 | (76)  | 734 | (26) | 858 | (26) | 925 | (14) | 990 | (9)  | 975 | (3) | 970 | (2) |
| 4,000  | 526 | (14)  | 754 | (18) | 831 | (32) | 916 | (19) | 985 | (3)  | 974 | (3) | 965 | (3) |
| 4,500  | 524 | (68)  | 752 | (14) | 824 | (40) | 932 | (4)  | 984 | (10) | 983 | (5) | 964 | (1) |
| 5,000  | 489 | (54)  | 734 | (42) | 817 | (11) | 931 | (9)  | 991 | (7)  | 981 | (8) | 959 | (3) |
| 5,500  | 507 | (16)  | 773 | (53) | 835 | (5)  | 925 | (7)  | 989 | (9)  | 982 | (2) | 959 | (1) |
| 6,000  | 466 | (89)  | 755 | (20) | 810 | (22) | 924 | (27) | 988 | (3)  | 980 | (3) | 955 | (1) |
| 6,500  | 468 | (79)  | 774 | (24) | 812 | (20) | 926 | (9)  | 992 | (8)  | 983 | (2) | 955 | (3) |
| 7,000  | 505 | (40)  | 754 | (51) | 811 | (11) | 925 | (12) | 991 | (4)  | 984 | (1) | 952 | (3) |
| 7,500  | 528 | (32)  | 770 | (15) | 827 | (41) | 928 | (13) | 989 | (4)  | 983 | (6) | 953 | (1) |
| 8,000  | 527 | (10)  | 754 | (19) | 808 | (17) | 930 | (13) | 984 | (2)  | 982 | (3) | 950 | (1) |
| 8,500  | 456 | (61)  | 733 | (10) | 815 | (9)  | 943 | (8)  | 993 | (6)  | 981 | (4) | 950 | (3) |
| 9,000  | 513 | (78)  | 745 | (15) | 815 | (30) | 944 | (11) | 983 | (7)  | 983 | (2) | 949 | (2) |
| 9,500  | 529 | (19)  | 761 | (19) | 804 | (24) | 941 | (8)  | 985 | (7)  | 979 | (5) | 947 | (2) |
| 10,000 | 516 | (98)  | 762 | (32) | 808 | (35) | 943 | (8)  | 984 | (5)  | 982 | (1) | 947 | (1) |
| 15,000 | 487 | (77)  | 749 | (22) | 808 | (49) | 947 | (16) | 989 | (6)  | 985 | (5) | 945 | (1) |
| 20,000 | 489 | (53)  | 766 | (18) | 830 | (9)  | 935 | (16) | 978 | (5)  | 984 | (5) | 946 | (3) |
| 25,000 | 494 | (28)  | 739 | (12) | 810 | (39) | 943 | (9)  | 985 | (7)  | 982 | (1) | 943 | (1) |
| 30,000 | 464 | (31)  | 744 | (22) | 805 | (17) | 950 | (14) | 983 | (3)  | 983 | (3) | 940 | (0) |
| 35,000 | 469 | (25)  | 751 | (1)  | 805 | (26) | 956 | (3)  | 988 | (6)  | 983 | (8) | 942 | (1) |
| 40,000 | 539 | (55)  | 776 | (31) | 830 | (41) | 943 | (18) | 988 | (6)  | 987 | (4) | 944 | (2) |
| 45,000 | 537 | (31)  | 764 | (21) | 817 | (7)  | 949 | (7)  | 979 | (8)  | 982 | (1) | 941 | (1) |
| 50,000 | 487 | (52)  | 754 | (15) | 820 | (30) | 962 | (20) | 984 | (5)  | 983 | (2) | 945 | (3) |
| 55,000 | 516 | (108) | 750 | (20) | 788 | (10) | 949 | (8)  | 987 | (3)  | 986 | (5) | 943 | (0) |
| 60,000 | 520 | (49)  | 728 | (35) | 778 | (4)  | 963 | (12) | 986 | (12) | 984 | (3) | 943 | (3) |

---

[a] The measured concentrations are displayed in ascending order of absolute chemical shift difference between the analyte signal and presaturation offset. The number in parenthesis indicates the standard deviation obtained by three repeated measures at the same presaturation time.

Supplementary Information

**Table S15** Unconverted concentration data corresponding to Fig. S12.

| Presatura-<br>tion time<br>(ms) | Measured concentration <sup>[a]</sup><br>(mg kg <sup>-1</sup> ) |       |         |      |                     |       |     |       |        |      |        |      |                     |     |
|---------------------------------|-----------------------------------------------------------------|-------|---------|------|---------------------|-------|-----|-------|--------|------|--------|------|---------------------|-----|
|                                 | Phe NCH                                                         |       | Val NCH |      | Phe CH <sub>2</sub> |       | MA  |       | Val CH |      | Phe CH |      | Val CH <sub>3</sub> |     |
| 50                              | 454                                                             | (45)  | 766     | (22) | 816                 | (127) | 923 | (29)  | 939    | (22) | 928    | (6)  | 975                 | (3) |
| 80                              | 435                                                             | (209) | 709     | (52) | 802                 | (75)  | 908 | (9)   | 897    | (12) | 922    | (7)  | 959                 | (2) |
| 100                             | 507                                                             | (18)  | 636     | (56) | 876                 | (24)  | 878 | (125) | 934    | (17) | 924    | (5)  | 966                 | (4) |
| 150                             | 555                                                             | (61)  | 745     | (78) | 861                 | (29)  | 911 | (72)  | 930    | (15) | 923    | (9)  | 973                 | (5) |
| 200                             | 518                                                             | (91)  | 697     | (56) | 835                 | (18)  | 934 | (79)  | 939    | (14) | 920    | (5)  | 964                 | (3) |
| 300                             | 485                                                             | (41)  | 752     | (37) | 779                 | (7)   | 894 | (108) | 948    | (9)  | 926    | (11) | 968                 | (2) |
| 400                             | 513                                                             | (78)  | 719     | (26) | 823                 | (19)  | 938 | (30)  | 937    | (8)  | 933    | (6)  | 971                 | (5) |
| 500                             | 514                                                             | (102) | 698     | (34) | 818                 | (11)  | 876 | (24)  | 953    | (3)  | 925    | (6)  | 967                 | (2) |
| 600                             | 494                                                             | (36)  | 797     | (22) | 838                 | (22)  | 915 | (105) | 958    | (3)  | 940    | (5)  | 971                 | (7) |
| 700                             | 428                                                             | (41)  | 743     | (52) | 839                 | (18)  | 918 | (34)  | 944    | (4)  | 936    | (9)  | 971                 | (3) |
| 800                             | 464                                                             | (19)  | 781     | (79) | 833                 | (14)  | 915 | (33)  | 943    | (6)  | 929    | (1)  | 970                 | (5) |
| 900                             | 432                                                             | (90)  | 688     | (16) | 816                 | (24)  | 932 | (59)  | 945    | (13) | 938    | (11) | 975                 | (4) |
| 1,000                           | 463                                                             | (51)  | 713     | (20) | 798                 | (23)  | 868 | (25)  | 943    | (13) | 934    | (7)  | 969                 | (3) |
| 1,500                           | 471                                                             | (59)  | 745     | (17) | 823                 | (14)  | 911 | (11)  | 956    | (7)  | 940    | (12) | 967                 | (6) |
| 2,000                           | 487                                                             | (25)  | 709     | (27) | 807                 | (7)   | 913 | (53)  | 953    | (17) | 943    | (4)  | 965                 | (3) |
| 2,500                           | 479                                                             | (31)  | 736     | (12) | 808                 | (13)  | 887 | (9)   | 962    | (5)  | 943    | (7)  | 959                 | (4) |
| 3,000                           | 493                                                             | (10)  | 749     | (57) | 820                 | (15)  | 907 | (11)  | 954    | (11) | 944    | (2)  | 956                 | (2) |
| 3,500                           | 464                                                             | (35)  | 716     | (43) | 814                 | (13)  | 886 | (17)  | 964    | (9)  | 953    | (4)  | 951                 | (6) |
| 4,000                           | 480                                                             | (22)  | 708     | (32) | 815                 | (26)  | 917 | (12)  | 966    | (7)  | 952    | (4)  | 951                 | (3) |
| 4,500                           | 472                                                             | (25)  | 740     | (16) | 801                 | (10)  | 894 | (14)  | 956    | (9)  | 950    | (2)  | 948                 | (0) |
| 5,000                           | 463                                                             | (40)  | 748     | (19) | 794                 | (17)  | 925 | (18)  | 963    | (3)  | 955    | (4)  | 949                 | (5) |
| 5,500                           | 490                                                             | (54)  | 750     | (23) | 809                 | (7)   | 909 | (16)  | 961    | (10) | 960    | (6)  | 946                 | (5) |
| 6,000                           | 461                                                             | (19)  | 753     | (44) | 794                 | (9)   | 921 | (31)  | 970    | (8)  | 957    | (3)  | 942                 | (4) |
| 6,500                           | 444                                                             | (58)  | 752     | (10) | 798                 | (16)  | 902 | (21)  | 965    | (10) | 958    | (7)  | 942                 | (4) |
| 7,000                           | 439                                                             | (46)  | 761     | (18) | 807                 | (10)  | 909 | (34)  | 958    | (5)  | 954    | (3)  | 943                 | (2) |
| 7,500                           | 482                                                             | (14)  | 753     | (38) | 786                 | (8)   | 925 | (17)  | 958    | (10) | 955    | (4)  | 939                 | (0) |
| 8,000                           | 476                                                             | (35)  | 737     | (26) | 799                 | (1)   | 926 | (18)  | 969    | (6)  | 957    | (5)  | 939                 | (2) |
| 8,500                           | 469                                                             | (89)  | 742     | (30) | 793                 | (24)  | 898 | (12)  | 973    | (14) | 954    | (4)  | 932                 | (1) |
| 9,000                           | 438                                                             | (24)  | 757     | (23) | 812                 | (25)  | 903 | (13)  | 969    | (6)  | 957    | (4)  | 937                 | (1) |
| 9,500                           | 434                                                             | (36)  | 733     | (8)  | 802                 | (12)  | 932 | (20)  | 963    | (5)  | 960    | (2)  | 935                 | (3) |

*Supplementary Information*

|        |          |          |          |          |          |         |         |
|--------|----------|----------|----------|----------|----------|---------|---------|
| 10,000 | 450 (32) | 720 (18) | 783 (17) | 922 (18) | 973 (10) | 963 (9) | 935 (2) |
| 15,000 | 439 (30) | 725 (2)  | 803 (8)  | 929 (25) | 965 (11) | 953 (2) | 931 (2) |
| 20,000 | 449 (20) | 744 (26) | 807 (4)  | 944 (14) | 973 (13) | 963 (6) | 935 (4) |
| 25,000 | 412 (37) | 739 (9)  | 804 (6)  | 937 (28) | 964 (5)  | 960 (4) | 932 (5) |
| 30,000 | 451 (26) | 737 (18) | 808 (6)  | 927 (14) | 971 (10) | 961 (2) | 935 (7) |
| 35,000 | 460 (9)  | 739 (27) | 804 (12) | 926 (27) | 958 (14) | 954 (5) | 930 (7) |
| 40,000 | 462 (28) | 751 (29) | 792 (4)  | 917 (27) | 971 (1)  | 957 (5) | 930 (4) |
| 45,000 | 451 (43) | 759 (20) | 795 (4)  | 911 (30) | 960 (16) | 958 (1) | 927 (4) |
| 50,000 | 456 (48) | 764 (42) | 793 (11) | 923 (7)  | 964 (12) | 956 (4) | 929 (1) |
| 55,000 | 414 (27) | 763 (31) | 788 (27) | 891 (13) | 967 (3)  | 954 (6) | 924 (7) |
| 60,000 | 482 (57) | 745 (24) | 804 (8)  | 927 (19) | 968 (5)  | 964 (2) | 933 (3) |

[a] The measured concentrations are displayed in ascending order of absolute chemical shift difference between the analyte signal and presaturation offset. The number in parenthesis indicates the standard deviation obtained by three repeated measures at the same presaturation time.

**Table SI6** Unconverted concentration data corresponding to Fig. SI3.

| Presatura-<br>tion time<br>(ms) | Measured concentration <sup>[a]</sup><br>(mg kg <sup>-1</sup> ) |         |                     |       |        |        |                     |
|---------------------------------|-----------------------------------------------------------------|---------|---------------------|-------|--------|--------|---------------------|
|                                 | Phe NCH                                                         | Val NCH | Phe CH <sub>2</sub> | MA    | Val CH | Phe CH | Val CH <sub>3</sub> |
| 50                              | 6.8                                                             | 26.2    | -2.4                | 20.1  | 23.8   | 22.6   | 15.2                |
| 80                              | 74.1                                                            | -83.9   | -5.0                | 23.9  | 58.6   | 23.8   | 12.6                |
| 100                             | 48.4                                                            | 80.2    | -61.8               | 19.6  | 24.4   | 26.9   | 16.3                |
| 150                             | -30.6                                                           | 52.3    | 25.8                | 4.9   | 14.5   | 24.6   | 3.6                 |
| 200                             | -21.1                                                           | 18.3    | 34.6                | -30.2 | 18.4   | 29.3   | 18.2                |
| 300                             | 47.0                                                            | -81.6   | 36.2                | -12.9 | 13.1   | 25.3   | 12.5                |
| 400                             | -45.8                                                           | 23.4    | 67.1                | 15.1  | 22.9   | 26.0   | 14.8                |
| 500                             | -50.5                                                           | -8.6    | 7.7                 | 51.3  | 20.8   | 33.7   | 21.2                |
| 600                             | -0.8                                                            | -86.0   | 7.6                 | 4.1   | 12.1   | 23.7   | 15.4                |
| 700                             | -27.3                                                           | -41.4   | 22.1                | 6.1   | 21.4   | 23.4   | 15.9                |
| 800                             | 41.0                                                            | -42.7   | 14.0                | 3.2   | 18.5   | 30.3   | 11.2                |

*Supplementary Information*

|        |        |       |       |       |      |      |      |
|--------|--------|-------|-------|-------|------|------|------|
| 900    | -101.3 | 39.8  | 25.2  | -18.2 | 16.2 | 21.8 | 9.8  |
| 1,000  | 21.8   | -43.0 | 48.0  | 49.5  | 16.5 | 30.2 | 15.6 |
| 1,500  | -12.5  | 7.9   | 0.9   | 3.1   | 23.9 | 24.4 | 14.3 |
| 2,000  | -27.3  | -4.9  | 17.0  | -2.6  | 25.1 | 29.1 | 16.7 |
| 2,500  | -35.7  | -14.3 | 26.9  | 14.7  | 22.0 | 31.6 | 17.4 |
| 3,000  | 1.5    | -5.8  | 36.3  | 14.4  | 29.2 | 30.5 | 16.3 |
| 3,500  | 17.4   | 18.3  | 43.9  | 39.0  | 26.3 | 21.9 | 19.0 |
| 4,000  | 46.2   | 45.2  | 15.9  | -0.8  | 19.2 | 21.4 | 14.0 |
| 4,500  | 52.1   | 11.6  | 22.7  | 37.6  | 27.5 | 32.4 | 16.4 |
| 5,000  | 26.0   | -13.6 | 22.8  | 6.3   | 27.0 | 26.3 | 10.7 |
| 5,500  | 17.0   | 22.8  | 26.7  | 16.4  | 27.7 | 21.8 | 13.2 |
| 6,000  | 5.4    | 2.1   | 16.1  | 3.4   | 17.2 | 22.6 | 13.4 |
| 6,500  | 24.0   | 22.0  | 14.5  | 24.3  | 26.6 | 25.3 | 12.5 |
| 7,000  | 66.3   | -7.8  | 4.1   | 16.0  | 32.9 | 29.5 | 8.7  |
| 7,500  | 45.9   | 16.9  | 40.6  | 2.9   | 31.0 | 27.4 | 13.9 |
| 8,000  | 51.4   | 16.7  | 9.2   | 3.7   | 15.0 | 25.1 | 11.6 |
| 8,500  | -12.3  | -9.1  | 21.7  | 45.0  | 19.4 | 26.9 | 18.0 |
| 9,000  | 74.4   | -12.3 | 3.5   | 41.2  | 13.7 | 26.0 | 11.6 |
| 9,500  | 95.0   | 27.6  | 2.1   | 9.1   | 21.8 | 19.3 | 12.2 |
| 10,000 | 65.8   | 42.1  | 24.8  | 21.2  | 11.1 | 18.8 | 12.0 |
| 15,000 | 48.0   | 24.5  | 4.5   | 18.3  | 23.6 | 32.0 | 13.6 |
| 20,000 | 39.6   | 22.1  | 23.1  | -8.8  | 5.4  | 21.5 | 11.0 |
| 25,000 | 81.9   | 0.1   | 5.5   | 5.4   | 20.8 | 21.8 | 10.8 |
| 30,000 | 13.3   | 7.7   | -3.7  | 22.8  | 12.0 | 21.8 | 4.9  |
| 35,000 | 9.0    | 12.0  | 1.0   | 29.6  | 30.1 | 28.2 | 11.7 |
| 40,000 | 77.3   | 25.7  | 37.5  | 26.7  | 17.9 | 30.1 | 13.8 |
| 45,000 | 86.6   | 5.0   | 22.3  | 38.2  | 18.8 | 24.0 | 14.4 |
| 50,000 | 31.1   | -10.2 | 26.6  | 39.5  | 20.4 | 27.0 | 15.5 |
| 55,000 | 102.1  | -13.1 | -0.1  | 57.5  | 20.5 | 32.2 | 18.8 |
| 60,000 | 38.6   | -17.8 | -25.8 | 36.5  | 18.5 | 20.0 | 10.1 |

[a] The measured concentrations are displayed in ascending order of absolute chemical shift difference between the analyte signal and presaturation offset.
